# Supplementary material for: FgFAD12 Regulates Vegetative Growth, Pathogenicity and Linoleic Acid Biosynthesis in Fusarium graminearum
Source: MDPI journal article supplement (doi:10.3390/jof10040288), 2024-04-14
Supplement: s1 [file s1]

## SupplementaryTable

Table S1. The primers used in this study

| Primer      | sequence (5'-3' )                                     |
|-------------|-------------------------------------------------------|
| 05784-1F    | GATGACCGTAGCTGAGAAGC                                  |
| 05784-2R    | TTGACCTCCACTAGCTCCAGCCAAGCCAAGGTGGAACGATAATGAAG<br>AG |
| 05784-3F    | GAATAGAGTAGATGCCGACCGCGGGTTTAGTCAGTCTCGCTACGGGT<br>TG |
| 05784-4R    | AGGCTTGGGCTTAGGTTTCAG                                 |
| 05784-5F    | TGAGTCTGCTGCCGTTTCT                                   |
| 05784-6R    | ACGCTCGTGGTAGTTGTGG                                   |
| 05784-7F    | AGCAAGATTTCGAGACACAGACTA                              |
| 05784-8R    | AGCAGAATACAGTTTAGTTAGGC                               |
| 05784hb/F   | AGGGAACAAAAGCTGGGTACCTCTCGGTTGAACGCTCTAAT             |
| 05784hb/R   | GAACAGCTCCTCGCCCTTGCTCACAGCCTTGAGGACGGCAGGAG          |
| pKNTG seq/F | CCCCAGGCTTTACACTTTATGCT                               |
| pKNTG seq/R | GTGCTGCTTCATGTGGTCGG                                  |
| qRT05784-F  | GACCCTACCCTTCCCCACTACA                                |
| qRT05784-R  | CTTGCCCATGACAGGCTTGAT                                 |
| qRT06184F   | CTCAAGCAGAACCCCAAGCGA                                 |
| qRT06184-R  | AGCAGGGAAAGCAAGAGCCAT                                 |
| qRT07890-F  | ATCACCTACCTCCACCACCACC                                |
| qRT07890-R  | GCCAATGAAGCCAAACTCGC                                  |
| Tubulin-F   | CGTCCAGAGCAAGAACTCATCA                                |
| Tubulin-R   | TGCGTCGGAACATAGCAGTAA                                 |
