# Supplementary material for: FgFAD12 Regulates Vegetative Growth, Pathogenicity and Linoleic Acid Biosynthesis in Fusarium graminearum
Source: MDPI journal article supplement (doi:10.3390/jof10040288), 2024-04-14
Supplement: s1 [file s1]

Table S3. Ergosterol content of PH-1 and  $\Delta Fgfa12$  strains

| Strain          | Content of ergosterol ( $\times 10^{-4}\%$ ) |
|-----------------|----------------------------------------------|
| PH-1            | $60.98 \pm 6.71$                             |
| $\Delta Fgfa12$ | $87.42 \pm 6.37$                             |
